# Supplementary material for: The central nervous system transcriptome of the weakly electric brown ghost knifefish (Apteronotus leptorhynchus): de novo assembly, annotation, and proteomics validation
Source: PubMed Central journal article supplement (PMC4424500; doi:10.1186/s12864-015-1354-2), 2015-03-11
Supplement: 12864_2015_1354_MOESM1_ESM.pdf [file 12864_2015_1354_MOESM1_ESM.pdf]

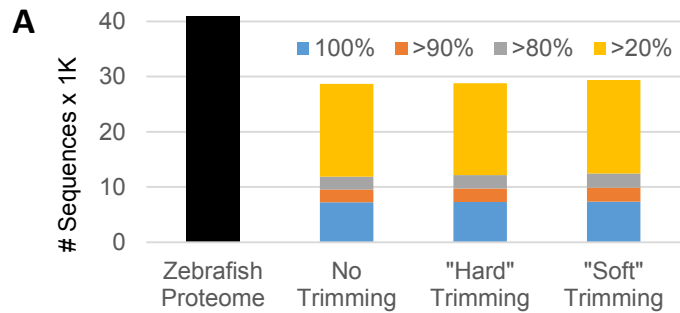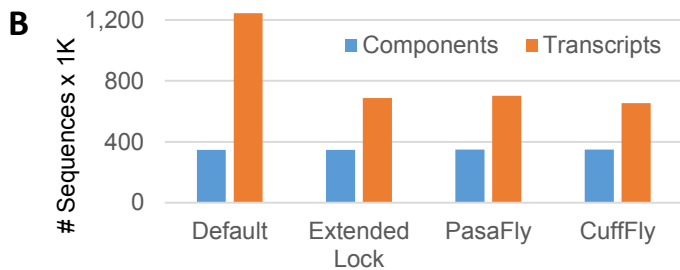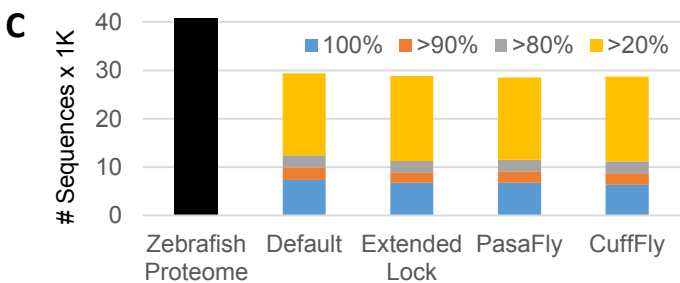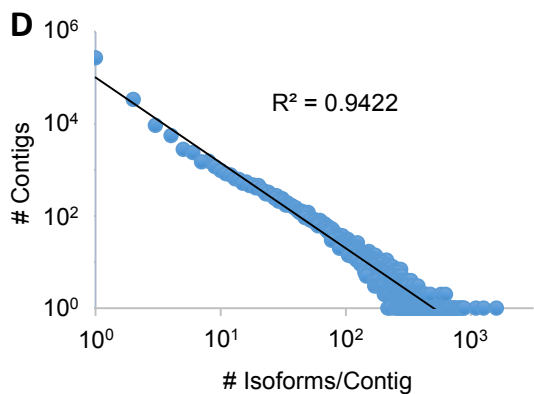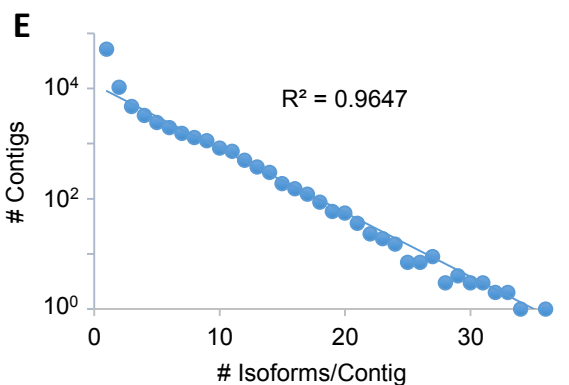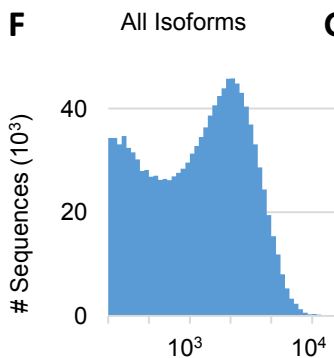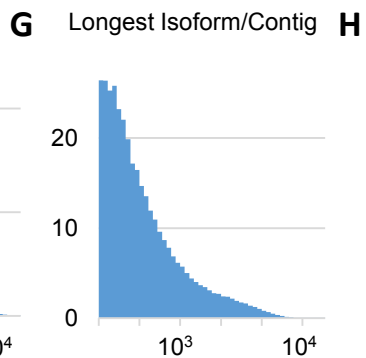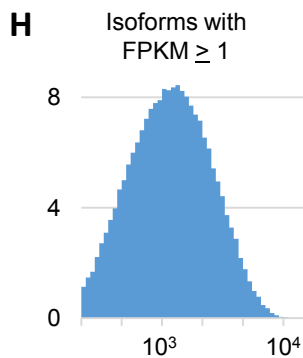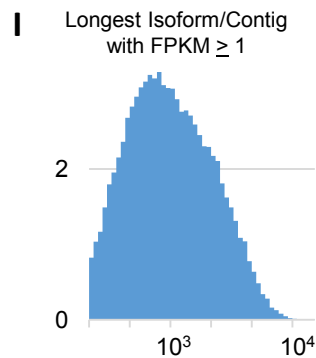

Sequence Length (bp)
