# Supplementary material for: The central nervous system transcriptome of the weakly electric brown ghost knifefish (Apteronotus leptorhynchus): de novo assembly, annotation, and proteomics validation
Source: PubMed Central journal article supplement (PMC4424500; doi:10.1186/s12864-015-1354-2), 2015-03-11
Supplement: 12864_2015_1354_MOESM8_ESM.pdf [file 12864_2015_1354_MOESM8_ESM.pdf]

A2BHK0\_DANRE  
 comp167859\_c1\_seq2 MAGKVNKEDTSSLHLGNTPVNNGDKTSKRKISDVDTQAQHHPDKSAVPMQKHISDPHCT 60  
 comp168050\_c0\_seq1 -----  
 comp177116\_c0\_seq5 -----  
 comp165668\_c0\_seq4 -----

A2BHK0\_DANRE  
 comp167859\_c1\_seq2 -----MYQLSQPEMITGK 13  
 comp168050\_c0\_seq1 VPESSTCVTMETTEDCLVHKHQIMKDENLSNDGEEQVKIDLLDAINDDQTLGNNARKSLR 120  
 comp177116\_c0\_seq5 -----MFQALI 6  
 comp165668\_c0\_seq4 -----CSSDL 5  
 -----MFLTSKEIMNSEYKESDQDL 20

A2BHK0\_DANRE  
 comp167859\_c1\_seq2 YYYVLETGRTGKLRMEILKHLKQRSHLEEVSVNQCDVILVLCPL---ITSRAGTDIDAA 70  
 comp168050\_c0\_seq1 KYFTFVPGNTFNSHETFKTRLQQEVPHLQEVFTTEECDFFVLFVFCP---VVS RAGTDIEAA 177  
 comp177116\_c0\_seq5 RVFVMVFGNTMKSHE SFVKNLQSF-NLEEVSSANS CDVILAFVS---VVS RAGTDIDAA 62  
 comp165668\_c0\_seq4 EFKYFVAETNKKPPDSVRKAVHKRIPQLLEVSTVEECDIILVFYLTPEISSWSETDIAEA 65  
 KGFFTIQDPENAINLNLFLEFFHDV RPD LKEVPSVEKSDLVLVFCY---VSEIQRDIEKA 76  
 . . . \* \*\* : : . \* . : : \* \*\* \*

A2BHK0\_DANRE  
 comp167859\_c1\_seq2 LNKLN--KLSASKPAIFMVLHHTSDPYKVVPDSGRFIQ-GMNMLTVDILFYEDVGLLNCI 127  
 comp168050\_c0\_seq1 LMKLNSFKTSGSKPAVIVVLHHTFDQPRI V PDSRRSVN-RMDTITVDCLFYEDTGLLQCP 236  
 comp177116\_c0\_seq5 LQKIP----DGRPVLLVVLHHTFDPHYHIAPQSRLCVMNRSVDFAVDCLYENHGLLKS L 117  
 comp165668\_c0\_seq4 MQTIS--CITGTKPVLMVFHHTVNPEYTPPDSRRWVT-MSDTFSVDCLFAEDKGLLPCP 122  
 LQKLN--SVAASKPAVLVVLHYTSDPKNIS-DSTKYVN-RWDTITVDCLISEDKTLKCS 132  
 : . : : \* . : : \* . \* \* : \* : : : \* \* \* \* \* : \* \* .

A2BHK0\_DANRE  
 comp167859\_c1\_seq2 MNDEALGRVVRCFKPQ----- 143  
 comp168050\_c0\_seq1 KNDEAIEQIKEWIKSQVHEEQETGYL----- 262  
 comp177116\_c0\_seq5 HNDNALKAVKQHLRENVLS----- 136  
 comp165668\_c0\_seq4 KNDEAFYEFFKWLESKV FVS----- 142  
 KNDELLSRFAKQITSEVVFSEVKEEVTPLLIWHHTTAICVCFLLLKETYSFYMIYFLWPI 192  
 \*\*: : . . : :

A2BHK0\_DANRE  
 comp167859\_c1\_seq2 -----FYPYKIIIEYGWATFKFLFSFVTRSN TYSENPA SESMKQMSETVVATK 309  
 comp168050\_c0\_seq1 -----KKHLTFNTKE-SESVC PMTPTYKLIYIVIIIFTF 168  
 comp177116\_c0\_seq5 -----IRQRFA----- 148  
 comp165668\_c0\_seq4 FCSFKDQAHCTAKQLPSPFLHKYFADFIGVQPQCYVEILSGLHEQR PDLQEVATVEKCDV 252

A2BHK0\_DANRE  
 comp167859\_c1\_seq2 LRLVLLGRTGSGKSA----- 324  
 comp168050\_c0\_seq1 IYIFYSLKNIL----- 179  
 comp177116\_c0\_seq5 -----  
 comp165668\_c0\_seq4 ILAFFISRPGSGIEAALKQIDSH TSGSKPVVL 283
